# Supplementary material
Source: PubMed Central journal article supplement (PMC1440832)
Supplement: 7601053s2.pdf [file 7601053s2.pdf]

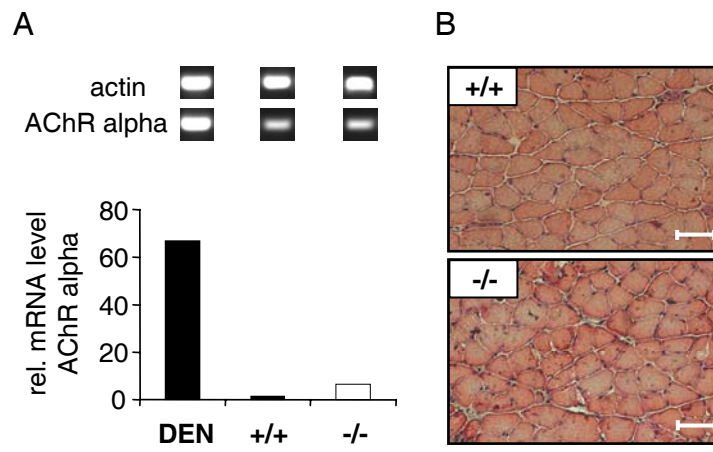

**Supplementary Figure 2** Muscular innervation and structure is normal in *mabpI*<sup>-/-</sup> mice. (A) Muscular receptor expression is not affected in *mabpI*<sup>-/-</sup> mice. *M. vastus* of wild-type mice was experimentally denervated (DEN) or left untreated. Induction of increased AChR alpha expression in denervated *M. vastus* were compared to that of untreated *M. vastus* from *abpI*<sup>-/-</sup> and *mabpI*<sup>+/+</sup> mice at 14 weeks of age by PCR using actin as control. Differences in AChR alpha expression were subsequently quantified by real time PCR. (B) Immunohistochemistry of *M. gastrocnemius* from *mabpI*<sup>+/+</sup> and *mabpI*<sup>-/-</sup> mice revealed no structural changes in skeletal muscle (hematoxylin/eosin (HE)-staining; scale bars 100 μm).
