# Supplementary material
Source: PubMed Central journal article supplement (PMC1440832)
Supplement: 7601053s5.pdf [file 7601053s5.pdf]

**Supplementary Movies** 1(A) swimming behaviour\_wild-type mouse, 1(B) swimming behaviour\_*mabp1*-deficient mouse. Wild-type and *mabp1*-deficient mice were placed in a water basin and swimming behaviour was analyzed.
